# Supplementary material for: Cord serum metabolome and birth weight in patients with gestational diabetes treated with metformin, insulin, or diet alone
Source: PubMed Central journal article supplement — BMJ Open Diabetes Res Care. 2021 May 31;9(1):e002022. doi: 10.1136/bmjdrc-2020-002022 (PMC8169462; doi:10.1136/bmjdrc-2020-002022), 2021-05-31
Supplement: bmjdrc-2020-002022supp002.pdf [file bmjdrc-2020-002022supp002.pdf]

Supplementary table 1 – Comparison of cord serum metabolites between metformin, insulin, and diet treatment groups

|                                                                  | Unit   | Diet                      |     | Insulin                   |    | Metformin                 |    | p-values |                 |                   |                      |
|------------------------------------------------------------------|--------|---------------------------|-----|---------------------------|----|---------------------------|----|----------|-----------------|-------------------|----------------------|
|                                                                  |        | median [IQR]              | n   | median [IQR]              | n  | median [IQR]              | n  | Overall  | Diet vs insulin | Diet vs metformin | Insulin vs metformin |
| <b>Triglycerides</b>                                             |        |                           |     |                           |    |                           |    |          |                 |                   |                      |
| Total triglycerides                                              | mmol/l | 0.36 [0.28–0.46]          | 113 | 0.31 [0.26–0.44]          | 97 | 0.32 [0.25–0.43]          | 98 | 0.22     | 0.24            | 0.39              | 0.96                 |
| Triglycerides in VLDL                                            | mmol/l | 0.14 [0.1–0.22]           | 113 | 0.12 [0.086–0.21]         | 97 | 0.13 [0.076–0.22]         | 98 | 0.27     | 0.28            | 0.43              | 0.99                 |
| Triglycerides in LDL                                             | mmol/l | 0.085 [0.073–0.095]       | 113 | 0.077 [0.068–0.089]       | 97 | 0.079 [0.068–0.086]       | 98 | 0.091    | 0.17            | 0.13              | 1                    |
| Triglycerides in HDL                                             | mmol/l | 0.057 [0.048–0.071]       | 113 | 0.052 [0.045–0.067]       | 97 | 0.055 [0.046–0.066]       | 98 | 0.32     | 0.29            | 0.73              | 0.75                 |
| Triglycerides in chylomicrons and extremely large VLDL           | mmol/l | 0 [0–0]                   | 113 | 0 [0–0]                   | 97 | 0 [0–0]                   | 98 | 0.6      | 0.89            | 0.84              | 0.57                 |
| Triglycerides in very large VLDL                                 | mmol/l | 0 [0–0.0031]              | 113 | 0 [0–0]                   | 97 | 0 [0–0.0048]              | 98 | 0.47     | 0.43            | 0.93              | 0.7                  |
| Triglycerides in large VLDL                                      | mmol/l | 0.011 [0–0.03]            | 113 | 0.0073 [0–0.023]          | 97 | 0.0037 [0–0.03]           | 98 | 0.42     | 0.69            | 0.42              | 0.86                 |
| Triglycerides in medium VLDL                                     | mmol/l | 0.043 [0.02–0.075]        | 113 | 0.032 [0.01–0.066]        | 97 | 0.032 [0.00046–0.069]     | 98 | 0.27     | 0.38            | 0.32              | 0.97                 |
| Triglycerides in small VLDL                                      | mmol/l | 0.055 [0.042–0.073]       | 113 | 0.047 [0.038–0.069]       | 97 | 0.05 [0.039–0.069]        | 98 | 0.17     | 0.16            | 0.42              | 0.83                 |
| Triglycerides in very small VLDL                                 | mmol/l | 0.039 [0.033–0.047]       | 113 | 0.035 [0.031–0.045]       | 97 | 0.037 [0.032–0.043]       | 98 | 0.078    | 0.084           | 0.24              | 0.81                 |
| Triglycerides in HDL                                             | mmol/l | 0.063 [0.055–0.071]       | 113 | 0.059 [0.051–0.067]       | 97 | 0.059 [0.052–0.065]       | 98 | 0.098    | 0.18            | 0.14              | 1                    |
| Triglycerides in large LDL                                       | mmol/l | 0.058 [0.051–0.068]       | 113 | 0.055 [0.048–0.064]       | 97 | 0.056 [0.048–0.06]        | 98 | 0.19     | 0.34            | 0.2               | 1                    |
| Triglycerides in medium LDL                                      | mmol/l | 0.017 [0.014–0.02]        | 113 | 0.016 [0.014–0.018]       | 97 | 0.016 [0.013–0.018]       | 98 | 0.18     | 0.31            | 0.2               | 1                    |
| Triglycerides in small LDL                                       | mmol/l | 0.0067 [0.0057–0.0081]    | 113 | 0.0061 [0.0053–0.0073]    | 97 | 0.0062 [0.0056–0.0073]    | 98 | 0.16     | 0.18            | 0.3               | 0.95                 |
| Triglycerides in very large HDL                                  | mmol/l | 0.0033 [0.0027–0.0041]    | 113 | 0.0033 [0.0025–0.0041]    | 97 | 0.0031 [0.0027–0.0039]    | 98 | 0.34     | 0.54            | 0.33              | 0.99                 |
| Triglycerides in large HDL                                       | mmol/l | 0.012 [0.0089–0.015]      | 113 | 0.012 [0.0078–0.015]      | 97 | 0.011 [0.0092–0.015]      | 98 | 0.7      | 0.76            | 0.74              | 0.98                 |
| Triglycerides in medium HDL                                      | mmol/l | 0.018 [0.014–0.022]       | 113 | 0.016 [0.013–0.021]       | 97 | 0.017 [0.013–0.022]       | 98 | 0.34     | 0.31            | 0.87              | 0.65                 |
| Triglycerides in small HDL                                       | mmol/l | 0.024 [0.021–0.029]       | 113 | 0.022 [0.019–0.028]       | 97 | 0.023 [0.02–0.029]        | 98 | 0.16     | 0.15            | 0.74              | 0.47                 |
| <b>Cholesterol</b>                                               |        |                           |     |                           |    |                           |    |          |                 |                   |                      |
| Total cholesterol                                                | mmol/l | 2 [1.6–2.5]               | 113 | 1.9 [1.7–2.3]             | 97 | 1.9 [1.6–2.3]             | 98 | 0.4      | 0.76            | 0.38              | 0.78                 |
| Total cholesterol minus HDL-C                                    | mmol/l | 1.2 [0.89–1.6]            | 113 | 1.1 [0.91–1.4]            | 97 | 1.1 [0.84–1.3]            | 98 | 0.2      | 0.52            | 0.19              | 0.73                 |
| Remnant cholesterol (non-HDL, non-LDL, cholesterol)              | mmol/l | 0.62 [0.54–0.77]          | 113 | 0.59 [0.5–0.69]           | 97 | 0.58 [0.51–0.68]          | 98 | 0.046    | 0.11            | 0.07              | 0.99                 |
| VLDL cholesterol                                                 | mmol/l | 0.25 [0.18–0.32]          | 113 | 0.22 [0.16–0.28]          | 97 | 0.21 [0.16–0.28]          | 98 | 0.039    | 0.082           | 0.07              | 0.99                 |
| Clinical LDL cholesterol                                         | mmol/l | 0.63 [0.32–1]             | 113 | 0.59 [0.38–0.85]          | 97 | 0.54 [0.27–0.83]          | 98 | 0.31     | 0.75            | 0.29              | 0.69                 |
| LDL cholesterol                                                  | mmol/l | 0.57 [0.32–0.82]          | 113 | 0.58 [0.38–0.71]          | 97 | 0.54 [0.27–0.69]          | 98 | 0.29     | 0.72            | 0.28              | 0.63                 |
| HDL cholesterol                                                  | mmol/l | 0.81 [0.73–0.95]          | 113 | 0.82 [0.72–0.95]          | 97 | 0.82 [0.74–0.92]          | 98 | 0.86     | 0.85            | 0.97              | 0.94                 |
| Cholesterol in chylomicrons and extremely large VLDL             | mmol/l | 0 [0–0]                   | 113 | 0 [0–0]                   | 97 | 0 [0–0]                   | 98 | 0.63     | 0.88            | 0.87              | 0.6                  |
| Cholesterol in very large VLDL                                   | mmol/l | 0 [0–0.012]               | 113 | 0 [0–0]                   | 97 | 0 [0–0.0097]              | 98 | 0.36     | 0.33            | 0.82              | 0.68                 |
| Cholesterol in large VLDL                                        | mmol/l | 0.013 [0–0.029]           | 113 | 0.011 [0–0.026]           | 97 | 0.0069 [0–0.026]          | 98 | 0.23     | 0.49            | 0.24              | 0.8                  |
| Cholesterol in medium VLDL                                       | mmol/l | 0.019 [0.0034–0.051]      | 113 | 0.016 [0.0025–0.035]      | 97 | 0.012 [0.00046–0.033]     | 98 | 0.14     | 0.37            | 0.14              | 0.87                 |
| Cholesterol in small VLDL                                        | mmol/l | 0.065 [0.045–0.086]       | 113 | 0.055 [0.039–0.075]       | 97 | 0.053 [0.036–0.074]       | 98 | 0.049    | 0.11            | 0.078             | 0.93                 |
| Cholesterol in very small VLDL                                   | mmol/l | 0.13 [0.11–0.14]          | 113 | 0.12 [0.11–0.14]          | 97 | 0.12 [0.11–0.13]          | 98 | 0.11     | 0.32            | 0.11              | 0.88                 |
| Cholesterol in IDL                                               | mmol/l | 0.38 [0.34–0.44]          | 113 | 0.36 [0.33–0.41]          | 97 | 0.36 [0.33–0.41]          | 98 | 0.18     | 0.31            | 0.21              | 0.99                 |
| Cholesterol in large LDL                                         | mmol/l | 0.37 [0.17–0.52]          | 113 | 0.35 [0.24–0.46]          | 97 | 0.33 [0.15–0.45]          | 98 | 0.28     | 0.7             | 0.27              | 0.68                 |
| Cholesterol in medium LDL                                        | mmol/l | 0.13 [0.076–0.18]         | 113 | 0.11 [0.075–0.16]         | 97 | 0.11 [0.061–0.16]         | 98 | 0.26     | 0.59            | 0.26              | 0.73                 |
| Cholesterol in small LDL                                         | mmol/l | 0.09 [0.072–0.11]         | 113 | 0.086 [0.072–0.1]         | 97 | 0.084 [0.067–0.098]       | 98 | 0.22     | 0.57            | 0.22              | 0.67                 |
| Cholesterol in very large HDL                                    | mmol/l | 0.1 [0.087–0.12]          | 113 | 0.11 [0.091–0.12]         | 97 | 0.1 [0.085–0.12]          | 98 | 0.63     | 0.99            | 0.73              | 0.64                 |
| Cholesterol in large HDL                                         | mmol/l | 0.23 [0.16–0.3]           | 113 | 0.23 [0.17–0.3]           | 97 | 0.23 [0.17–0.28]          | 98 | 0.77     | 0.93            | 0.93              | 0.75                 |
| Cholesterol in medium HDL                                        | mmol/l | 0.24 [0.2–0.28]           | 113 | 0.25 [0.21–0.29]          | 97 | 0.24 [0.21–0.28]          | 98 | 0.73     | 0.75            | 0.83              | 0.97                 |
| Cholesterol in small HDL                                         | mmol/l | 0.25 [0.23–0.28]          | 113 | 0.25 [0.22–0.28]          | 97 | 0.25 [0.22–0.28]          | 98 | 1        | 1               | 1                 | 1                    |
| <b>Total lipids</b>                                              |        |                           |     |                           |    |                           |    |          |                 |                   |                      |
| Total lipids in lipoprotein particles                            | mmol/l | 3.8 [3.2–4.6]             | 113 | 3.7 [3.2–4.3]             | 97 | 3.7 [3.1–4.2]             | 98 | 0.46     | 0.68            | 0.45              | 0.91                 |
| Total lipids in VLDL                                             | mmol/l | 0.55 [0.38–0.74]          | 113 | 0.47 [0.33–0.65]          | 97 | 0.45 [0.34–0.63]          | 98 | 0.09     | 0.14            | 0.15              | 1                    |
| Total lipids in LDL                                              | mmol/l | 0.89 [0.59–1.2]           | 113 | 0.87 [0.65–1.1]           | 97 | 0.84 [0.53–1]             | 98 | 0.26     | 0.68            | 0.25              | 0.66                 |
| Total lipids in HDL                                              | mmol/l | 1.7 [1.6–2]               | 113 | 1.8 [1.6–2]               | 97 | 1.8 [1.6–2]               | 98 | 0.86     | 0.87            | 0.92              | 0.98                 |
| Total lipids in chylomicrons and extremely large VLDL            | mmol/l | 0 [0–0]                   | 113 | 0 [0–0]                   | 97 | 0 [0–0]                   | 98 | 0.6      | 0.88            | 0.84              | 0.58                 |
| Total lipids in very large VLDL                                  | mmol/l | 0 [0–0.022]               | 113 | 0 [0–0]                   | 97 | 0 [0–0.02]                | 98 | 0.42     | 0.4             | 0.89              | 0.69                 |
| Total lipids in large VLDL                                       | mmol/l | 0.033 [0–0.074]           | 113 | 0.023 [0–0.065]           | 97 | 0.016 [0–0.069]           | 98 | 0.35     | 0.62            | 0.34              | 0.84                 |
| Total lipids in medium VLDL                                      | mmol/l | 0.093 [0.028–0.16]        | 113 | 0.071 [0.018–0.13]        | 97 | 0.055 [0.0013–0.12]       | 98 | 0.12     | 0.22            | 0.16              | 0.89                 |
| Total lipids in small VLDL                                       | mmol/l | 0.15 [0.11–0.2]           | 113 | 0.12 [0.097–0.18]         | 97 | 0.13 [0.093–0.18]         | 98 | 0.085    | 0.12            | 0.16              | 1                    |
| Total lipids in very small VLDL                                  | mmol/l | 0.24 [0.21–0.27]          | 113 | 0.23 [0.2–0.26]           | 97 | 0.23 [0.2–0.25]           | 98 | 0.078    | 0.17            | 0.099             | 0.98                 |
| Total lipids in IDL                                              | mmol/l | 0.57 [0.51–0.69]          | 113 | 0.56 [0.5–0.63]           | 97 | 0.55 [0.5–0.62]           | 98 | 0.23     | 0.4             | 0.24              | 0.96                 |
| Total lipids in large LDL                                        | mmol/l | 0.57 [0.32–0.75]          | 113 | 0.54 [0.39–0.68]          | 97 | 0.52 [0.3–0.66]           | 98 | 0.28     | 0.71            | 0.26              | 0.68                 |
| Total lipids in medium LDL                                       | mmol/l | 0.2 [0.13–0.27]           | 113 | 0.18 [0.13–0.24]          | 97 | 0.17 [0.11–0.24]          | 98 | 0.25     | 0.56            | 0.25              | 0.74                 |
| Total lipids in small LDL                                        | mmol/l | 0.15 [0.13–0.18]          | 113 | 0.15 [0.13–0.17]          | 97 | 0.14 [0.12–0.16]          | 98 | 0.17     | 0.48            | 0.16              | 0.7                  |
| Total lipids in very large HDL                                   | mmol/l | 0.21 [0.17–0.24]          | 113 | 0.21 [0.17–0.25]          | 97 | 0.2 [0.16–0.24]           | 98 | 0.69     | 1               | 0.77              | 0.69                 |
| Total lipids in large HDL                                        | mmol/l | 0.46 [0.34–0.58]          | 113 | 0.47 [0.35–0.59]          | 97 | 0.46 [0.37–0.56]          | 98 | 0.88     | 0.94            | 0.99              | 0.87                 |
| Total lipids in medium HDL                                       | mmol/l | 0.49 [0.42–0.57]          | 113 | 0.5 [0.44–0.57]           | 97 | 0.5 [0.44–0.56]           | 98 | 0.8      | 0.85            | 0.83              | 1                    |
| Total lipids in small HDL                                        | mmol/l | 0.61 [0.55–0.68]          | 113 | 0.6 [0.56–0.67]           | 97 | 0.6 [0.55–0.69]           | 98 | 0.95     | 0.94            | 0.98              | 1                    |
| <b>Lipoprotein particle concentrations</b>                       |        |                           |     |                           |    |                           |    |          |                 |                   |                      |
| Total concentration of lipoprotein particles                     | mmol/l | 0.011 [0.0094–0.013]      | 113 | 0.011 [0.0099–0.013]      | 97 | 0.011 [0.0097–0.013]      | 98 | 0.95     | 0.98            | 1                 | 0.92                 |
| Concentration of VLDL particles                                  | mmol/l | 7.2e-05 [5.6e-05–9.4e-05] | 113 | 6.4e-05 [4.9e-05–8e-05]   | 97 | 6.4e-05 [5e-05–8.1e-05]   | 98 | 0.087    | 0.15            | 0.14              | 1                    |
| Concentration of LDL particles                                   | mmol/l | 0.00034 [0.00023–5e-04]   | 113 | 0.00032 [0.00022–0.00043] | 97 | 3e-04 [0.00019–0.00041]   | 98 | 0.15     | 0.46            | 0.15              | 0.69                 |
| Concentration of HDL particles                                   | mmol/l | 0.011 [0.009–0.012]       | 113 | 0.011 [0.0095–0.012]      | 97 | 0.011 [0.0093–0.012]      | 98 | 0.91     | 0.93            | 0.98              | 0.93                 |
| Concentration of chylomicrons and extremely large VLDL particles | mmol/l | 0 [0–0]                   | 113 | 0 [0–0]                   | 97 | 0 [0–0]                   | 98 | 0.61     | 0.87            | 0.85              | 0.59                 |
| Concentration of very large VLDL particles                       | mmol/l | 0 [0–8.4e-07]             | 113 | 0 [0–0]                   | 97 | 0 [0–7.3e-07]             | 98 | 0.41     | 0.37            | 0.86              | 0.71                 |
| Concentration of large VLDL particles                            | mmol/l | 1.9e-06 [0–3.6e-06]       | 113 | 1.5e-06 [0–3.2e-06]       | 97 | 1.4e-06 [0–3.3e-06]       | 98 | 0.34     | 0.6             | 0.33              | 0.85                 |
| Concentration of medium VLDL particles                           | mmol/l | 7.4e-06 [2e-06–1.3e-05]   | 113 | 5.3e-06 [1e-06–9.7e-06]   | 97 | 4.4e-06 [4.7e-08–9.6e-06] | 98 | 0.092    | 0.2             | 0.12              | 0.88                 |
| Concentration of small VLDL particles                            | mmol/l | 1.9e-05 [1.4e-05–2.6e-05] | 113 | 1.5e-05 [1.2e-05–2.4e-05] | 97 | 1.7e-05 [1.2e-05–2.4e-05] | 98 | 0.11     | 0.14            | 0.21              | 0.99                 |
| Concentration of very small VLDL particles                       | mmol/l | 4.1e-05 [3.7e-05–4.9e-05] | 113 | 4e-05 [3.4e-05–4.6e-05]   | 97 | 3.9e-05 [3.5e-05–4.4e-05] | 98 | 0.12     | 0.27            | 0.13              | 0.92                 |
| Concentration of IDL particles                                   | mmol/l | 0.00013 [9.3e-05–0.00017] | 113 | 0.00012 [9.9e-05–0.00015] | 97 | 0.00012 [9.4e-05–0.00015] | 98 | 0.35     | 0.71            | 0.33              | 0.77                 |
| Concentration of large LDL particles                             | mmol/l | 0.00016 [9.3e-05–0.00027] | 113 | 0.00014 [9.2e-05–0.00021] | 97 | 0.00013 [6.8e-05–0.00021] | 98 | 0.15     | 0.47            | 0.15              | 0.68                 |
| Concentration of medium LDL particles                            | mmol/l | 8.4e-05 [5.1e-05–0.00012] | 113 | 7.1e-05 [4.5e-05–0.00011] | 97 | 6.7e-05 [3.9e-05–0.00011] | 98 | 0.18     | 0.41            | 0.2               | 0.76                 |
| Concentration of small LDL particles                             | mmol/l | 1e-04 [8.6e-05–0.00012]   | 113 | 9.7e-05 [8.6e-05–0.00011] | 97 | 9.5e-05 [8.3e-05–0.00011] | 98 | 0.15     | 0.46            | 0.13              | 0.77                 |
| Concentration of very large HDL particles                        | mmol/l | 0.00033 [0.00027–4e-04]   | 113 | 0.00033 [0.00027–4e-04]   | 97 | 0.00032 [0.00027–0.00038] | 98 | 0.66     | 0.99            | 0.69              | 0.73                 |
| Concentration of large HDL particles                             | mmol/l | 0.0013 [0.00087–0.0017]   | 113 | 0.0013 [0.00091–0.0018]   | 97 | 0.0013 [0.00097–0.0016]   | 98 | 0.88     | 0.96            | 0.97              | 0.87                 |

|                                                                                   |        |                        |     |                        |    |                        |    |            |       |         |            |
|-----------------------------------------------------------------------------------|--------|------------------------|-----|------------------------|----|------------------------|----|------------|-------|---------|------------|
| Concentration of medium HDL particles                                             | mmol/l | 0.0025 [0.0018–0.0028] | 113 | 0.0023 [0.0019–0.0028] | 97 | 0.0023 [0.0019–0.0027] | 98 | 0.86       | 0.88  | 0.91    | 0.99       |
| Concentration of small HDL particles                                              | mmol/l | 0.0068 [0.0059–0.0076] | 113 | 0.0068 [0.006–0.0075]  | 97 | 0.0066 [0.0059–0.0079] | 98 | 0.95       | 1     | 0.97    | 0.94       |
| <b>Phospholipids</b>                                                              |        |                        |     |                        |    |                        |    |            |       |         |            |
| Total phospholipids in lipoprotein particles                                      | mmol/l | 1.4 [1.2–1.6]          | 113 | 1.4 [1.2–1.6]          | 97 | 1.4 [1.2–1.6]          | 98 | 0.81       | 0.92  | 0.81    | 0.96       |
| Phospholipids in VLDL                                                             | mmol/l | 0.13 [0.096–0.19]      | 113 | 0.12 [0.083–0.16]      | 97 | 0.12 [0.082–0.16]      | 98 | 0.078      | 0.12  | 0.13    | 1          |
| Phospholipids in LDL                                                              | mmol/l | 0.24 [0.19–0.3]        | 113 | 0.23 [0.2–0.27]        | 97 | 0.23 [0.19–0.27]       | 98 | 0.31       | 0.67  | 0.3     | 0.72       |
| Phospholipids in HDL                                                              | mmol/l | 0.89 [0.78–0.99]       | 113 | 0.9 [0.8–1]            | 97 | 0.91 [0.81–0.99]       | 98 | 0.79       | 0.86  | 0.8     | 1          |
| Phosphoglycerides                                                                 | mmol/l | 1.3 [1.1–1.5]          | 112 | 1.2 [1–1.4]            | 97 | 1.2 [1–1.4]            | 97 | 0.37       | 0.55  | 0.37    | 0.98       |
| Ratio of triglycerides to phosphoglycerides                                       | ratio  | 0.27 [0.24–0.36]       | 112 | 0.27 [0.23–0.32]       | 97 | 0.27 [0.23–0.33]       | 97 | 0.23       | 0.21  | 0.62    | 0.72       |
| Total cholines                                                                    | mmol/l | 1.5 [1.2–1.7]          | 113 | 1.4 [1.2–1.7]          | 97 | 1.4 [1.2–1.6]          | 98 | 0.4        | 0.58  | 0.41    | 0.97       |
| Phosphatidylcholines                                                              | mmol/l | 1.2 [1–1.4]            | 113 | 1.2 [1–1.4]            | 97 | 1.2 [1–1.4]            | 98 | 0.45       | 0.49  | 0.57    | 1          |
| Sphingomyelins                                                                    | mmol/l | 0.19 [0.15–0.24]       | 113 | 0.19 [0.16–0.23]       | 97 | 0.18 [0.15–0.22]       | 98 | 0.51       | 0.98  | 0.67    | 0.5        |
| Phospholipids in chylomicrons and extremely large VLDL                            | mmol/l | 0 [0–0]                | 113 | 0 [0–0]                | 97 | 0 [0–0]                | 98 | 0.61       | 0.88  | 0.85    | 0.59       |
| Phospholipids in very large VLDL                                                  | mmol/l | 0 [0–0.0068]           | 113 | 0 [0–0]                | 97 | 0 [0–0.0045]           | 98 | 0.42       | 0.38  | 0.84    | 0.75       |
| Phospholipids in large VLDL                                                       | mmol/l | 0.0081 [0–0.018]       | 113 | 0.0068 [0–0.016]       | 97 | 0.0049 [0–0.016]       | 98 | 0.32       | 0.6   | 0.32    | 0.82       |
| Phospholipids in medium VLDL                                                      | mmol/l | 0.02 [0.0036–0.033]    | 113 | 0.013 [0.00096–0.025]  | 97 | 0.012 [7.6e-06–0.026]  | 98 | 0.094      | 0.22  | 0.12    | 0.84       |
| Phospholipids in small VLDL                                                       | mmol/l | 0.031 [0.021–0.042]    | 113 | 0.025 [0.017–0.034]    | 97 | 0.025 [0.017–0.035]    | 98 | 0.08       | 0.16  | 0.12    | 0.96       |
| Phospholipids in very small VLDL                                                  | mmol/l | 0.07 [0.063–0.08]      | 113 | 0.067 [0.059–0.076]    | 97 | 0.067 [0.06–0.073]     | 98 | 0.07       | 0.15  | 0.095   | 1          |
| Phospholipids in HDL                                                              | mmol/l | 0.15 [0.12–0.17]       | 113 | 0.14 [0.12–0.16]       | 97 | 0.14 [0.12–0.16]       | 98 | 0.46       | 0.79  | 0.46    | 0.78       |
| Phospholipids in large LDL                                                        | mmol/l | 0.13 [0.1–0.17]        | 113 | 0.13 [0.1–0.16]        | 97 | 0.13 [0.1–0.15]        | 98 | 0.36       | 0.75  | 0.34    | 0.76       |
| Phospholipids in medium LDL                                                       | mmol/l | 0.052 [0.038–0.068]    | 113 | 0.048 [0.038–0.062]    | 97 | 0.047 [0.035–0.062]    | 98 | 0.27       | 0.62  | 0.26    | 0.77       |
| Phospholipids in small LDL                                                        | mmol/l | 0.056 [0.051–0.061]    | 113 | 0.055 [0.05–0.059]     | 97 | 0.054 [0.05–0.058]     | 98 | 0.12       | 0.45  | 0.12    | 0.66       |
| Phospholipids in very large HDL                                                   | mmol/l | 0.099 [0.081–0.12]     | 113 | 0.1 [0.081–0.12]       | 97 | 0.097 [0.076–0.12]     | 98 | 0.72       | 0.99  | 0.81    | 0.71       |
| Phospholipids in large HDL                                                        | mmol/l | 0.22 [0.17–0.27]       | 113 | 0.22 [0.17–0.28]       | 97 | 0.22 [0.18–0.26]       | 98 | 0.91       | 0.92  | 1       | 0.92       |
| Phospholipids in medium HDL                                                       | mmol/l | 0.23 [0.21–0.27]       | 113 | 0.24 [0.21–0.27]       | 97 | 0.24 [0.21–0.27]       | 98 | 0.73       | 0.82  | 0.74    | 1          |
| Phospholipids in small HDL                                                        | mmol/l | 0.33 [0.3–0.38]        | 113 | 0.33 [0.31–0.37]       | 97 | 0.33 [0.31–0.38]       | 98 | 0.99       | 0.98  | 1       | 1          |
| <b>Particle diameter</b>                                                          |        |                        |     |                        |    |                        |    |            |       |         |            |
| Average diameter for VLDL particles                                               | nm     | 35 [34–36]             | 113 | 35 [34–35]             | 97 | 34 [33–36]             | 98 | 0.19       | 0.26  | 0.28    | 1          |
| Average diameter for LDL particles                                                | nm     | 23 [22–23]             | 113 | 23 [22–23]             | 97 | 23 [22–23]             | 98 | 0.15       | 0.5   | 0.14    | 0.63       |
| Average diameter for HDL particles                                                | nm     | 9.8 [9.6–9.9]          | 113 | 9.8 [9.6–10]           | 97 | 9.8 [9.6–9.9]          | 98 | 0.86       | 0.94  | 0.98    | 0.84       |
| <b>Apoproteins</b>                                                                |        |                        |     |                        |    |                        |    |            |       |         |            |
| Apolipoprotein B                                                                  | g/l    | 0.28 [0.2–0.4]         | 113 | 0.26 [0.2–0.33]        | 97 | 0.24 [0.18–0.33]       | 98 | 0.15       | 0.43  | 0.14    | 0.73       |
| Apolipoprotein A1                                                                 | g/l    | 0.76 [0.66–0.86]       | 113 | 0.78 [0.68–0.87]       | 97 | 0.78 [0.69–0.86]       | 98 | 0.77       | 0.82  | 0.8     | 1          |
| Ratio of apolipoprotein B to apolipoprotein A1                                    | ratio  | 0.37 [0.27–0.47]       | 113 | 0.35 [0.26–0.42]       | 97 | 0.31 [0.24–0.41]       | 98 | 0.052      | 0.23  | 0.054   | 0.69       |
| <b>Fatty acids</b>                                                                |        |                        |     |                        |    |                        |    |            |       |         |            |
| Total fatty acids                                                                 | mmol/l | 7.7 [6.7–8.7]          | 113 | 7.3 [6.6–8.2]          | 97 | 7.4 [6.7–8.1]          | 98 | 0.15       | 0.21  | 0.25    | 0.95       |
| Degree of unsaturation                                                            | degree | 0.83 [0.71–0.94]       | 113 | 0.79 [0.65–0.91]       | 97 | 0.79 [0.67–0.89]       | 98 | 0.17       | 0.25  | 0.24    | 1          |
| Omega-3 fatty acids                                                               | mmol/l | 0.28 [0.21–0.39]       | 113 | 0.26 [0.19–0.36]       | 97 | 0.28 [0.18–0.38]       | 98 | 0.17       | 0.18  | 0.35    | 0.97       |
| Omega-6 fatty acids                                                               | mmol/l | 2.9 [2.6–3.1]          | 113 | 2.8 [2.6–3]            | 97 | 2.8 [2.6–3]            | 98 | 0.18       | 0.21  | 0.32    | 0.99       |
| Polysaturated fatty acids                                                         | mmol/l | 3.2 [2.9–3.5]          | 113 | 3 [2.8–3.3]            | 97 | 3.1 [2.8–3.3]          | 98 | 0.094      | 0.12  | 0.2     | 0.93       |
| Monounsaturated fatty acids                                                       | mmol/l | 1.7 [1.4–2]            | 113 | 1.5 [1.3–1.8]          | 97 | 1.5 [1.4–1.8]          | 98 | 0.16       | 0.2   | 0.28    | 0.93       |
| Saturated fatty acids                                                             | mmol/l | 2.7 [2.4–3.1]          | 113 | 2.6 [2.4–3]            | 97 | 2.7 [2.4–2.9]          | 98 | 0.31       | 0.38  | 0.41    | 1          |
| Linoleic acid                                                                     | mmol/l | 1.9 [1.6–2.2]          | 113 | 1.7 [1.6–2]            | 97 | 1.8 [1.6–2.1]          | 98 | 0.052      | 0.056 | 0.18    | 0.87       |
| Docosahexaenoic acid                                                              | mmol/l | 0.34 [0.28–0.41]       | 113 | 0.31 [0.26–0.36]       | 97 | 0.31 [0.28–0.36]       | 98 | 0.021      | 0.031 | 0.1     | 0.65       |
| <b>Fatty acid ratios</b>                                                          |        |                        |     |                        |    |                        |    |            |       |         |            |
| Ratio of omega-3 fatty acids to total fatty acids                                 | %      | 3.8 [3.1–4.9]          | 113 | 3.6 [2.8–4.6]          | 97 | 3.5 [2.6–4.7]          | 98 | 0.23       | 0.26  | 0.37    | 0.99       |
| Ratio of omega-6 fatty acids to total fatty acids                                 | %      | 38 [36–40]             | 113 | 38 [37–40]             | 97 | 39 [37–40]             | 98 | 0.51       | 0.57  | 0.59    | 0.99       |
| Ratio of polysaturated fatty acids to total fatty acids                           | %      | 42 [41–44]             | 113 | 42 [41–43]             | 97 | 42 [41–43]             | 98 | 0.87       | 0.94  | 0.86    | 0.98       |
| Ratio of monounsaturated fatty acids to total fatty acids                         | %      | 22 [20–23]             | 113 | 21 [20–23]             | 97 | 22 [20–23]             | 98 | 0.29       | 0.28  | 0.56    | 0.85       |
| Ratio of saturated fatty acids to total fatty acids                               | %      | 36 [35–37]             | 113 | 36 [36–37]             | 97 | 36 [36–37]             | 98 | 0.025      | 0.027 | 0.22    | 0.43       |
| Ratio of linoleic acid to total fatty acids                                       | %      | 25 [23–27]             | 113 | 24 [23–26]             | 97 | 24 [23–26]             | 98 | 0.059      | 0.055 | 0.36    | 0.52       |
| Ratio of docosahexaenoic acid to total fatty acids                                | %      | 4.4 [4–4.9]            | 113 | 4.2 [3.9–4.5]          | 97 | 4.3 [4.1–4.6]          | 98 | 0.059      | 0.057 | 0.43    | 0.41       |
| Ratio of polysaturated fatty acids to monounsaturated fatty acids                 | ratio  | 1.9 [1.8–2.1]          | 113 | 2 [1.8–2.1]            | 97 | 2 [1.8–2.2]            | 98 | 0.41       | 0.41  | 0.61    | 0.96       |
| Ratio of omega-6 fatty acids to omega-3 fatty acids                               | ratio  | 9.7 [7.5–13]           | 113 | 11 [8.2–15]            | 97 | 11 [7.7–15]            | 98 | 0.23       | 0.25  | 0.39    | 0.98       |
| <b>Amino acids</b>                                                                |        |                        |     |                        |    |                        |    |            |       |         |            |
| Alanine                                                                           | mmol/l | 0.46 [0.4–0.53]        | 113 | 0.45 [0.4–0.52]        | 97 | 0.53 [0.45–0.59]       | 98 | 1.7e-05*** | 0.8   | 3e-04** | 6.9e-05*** |
| Glutamine                                                                         | mmol/l | 0.49 [0.41–0.56]       | 72  | 0.49 [0.44–0.56]       | 55 | 0.48 [0.41–0.58]       | 52 | 0.85       | 1     | 0.86    | 0.88       |
| Glycine                                                                           | mmol/l | 0.25 [0.22–0.29]       | 113 | 0.24 [0.22–0.27]       | 97 | 0.25 [0.22–0.28]       | 98 | 0.79       | 0.78  | 0.93    | 0.93       |
| Histidine                                                                         | mmol/l | 0.1 [0.093–0.11]       | 113 | 0.11 [0.097–0.11]      | 97 | 0.11 [0.097–0.12]      | 98 | 0.35       | 0.65  | 0.55    | 0.83       |
| Total concentration of branched-chain amino acids (leucine + isoleucine + valine) | mmol/l | 0.4 [0.36–0.45]        | 113 | 0.39 [0.35–0.43]       | 96 | 0.41 [0.36–0.45]       | 98 | 0.19       | 0.8   | 0.46    | 0.16       |
| Isoleucine                                                                        | mmol/l | 0.06 [0.05–0.069]      | 113 | 0.058 [0.05–0.069]     | 97 | 0.061 [0.053–0.068]    | 98 | 0.52       | 0.96  | 0.63    | 0.55       |
| Leucine                                                                           | mmol/l | 0.12 [0.1–0.13]        | 113 | 0.11 [0.1–0.13]        | 97 | 0.11 [0.1–0.13]        | 98 | 0.72       | 0.81  | 0.97    | 0.74       |
| Valine                                                                            | mmol/l | 0.22 [0.2–0.25]        | 113 | 0.22 [0.2–0.24]        | 96 | 0.23 [0.2–0.26]        | 98 | 0.064      | 0.82  | 0.17    | 0.075      |
| Phenylalanine                                                                     | mmol/l | 0.086 [0.079–0.093]    | 113 | 0.085 [0.078–0.093]    | 97 | 0.089 [0.08–0.098]     | 98 | 0.19       | 0.99  | 0.24    | 0.27       |
| Tyrosine                                                                          | mmol/l | 0.061 [0.055–0.067]    | 113 | 0.065 [0.057–0.072]    | 97 | 0.063 [0.055–0.07]     | 98 | 0.17       | 0.15  | 0.79    | 0.46       |
| <b>Glucose metabolism</b>                                                         |        |                        |     |                        |    |                        |    |            |       |         |            |
| Glucose                                                                           | mmol/l | 4.3 [3.4–5.4]          | 113 | 4 [3.4–5]              | 97 | 4.4 [3.4–5.4]          | 98 | 0.68       | 0.87  | 0.9     | 0.67       |
| Lactate                                                                           | mmol/l | 5.8 [4.8–7.4]          | 113 | 5.8 [4.5–7.6]          | 97 | 6.1 [5–7.6]            | 98 | 0.57       | 0.99  | 0.61    | 0.64       |
| Pyruvate                                                                          | mmol/l | 0.11 [0.08–0.14]       | 71  | 0.12 [0.086–0.15]      | 54 | 0.11 [0.09–0.15]       | 52 | 0.89       | 0.88  | 0.95    | 1          |
| Citrate                                                                           | mmol/l | 0.031 [0.025–0.038]    | 113 | 0.033 [0.026–0.038]    | 97 | 0.032 [0.025–0.039]    | 98 | 0.51       | 0.5   | 0.87    | 0.77       |
| Glycerol                                                                          | mmol/l | 0.12 [0.091–0.15]      | 103 | 0.12 [0.092–0.14]      | 92 | 0.11 [0.092–0.15]      | 95 | 0.95       | 0.94  | 0.97    | 1          |
| 3-Hydroxybutyrate                                                                 | mmol/l | 0.16 [0.078–0.29]      | 113 | 0.15 [0.08–0.26]       | 96 | 0.17 [0.075–0.31]      | 97 | 0.63       | 0.93  | 0.83    | 0.58       |
| Acetate                                                                           | mmol/l | 0.037 [0.029–0.047]    | 113 | 0.037 [0.03–0.048]     | 97 | 0.039 [0.031–0.049]    | 98 | 0.34       | 0.9   | 0.3     | 0.64       |
| Acetoacetate                                                                      | mmol/l | 0.0012 [0–0.0031]      | 113 | 0.0013 [0–0.0036]      | 97 | 0.00041 [0–0.0027]     | 98 | 0.59       | 0.9   | 0.79    | 0.58       |
| Acetone                                                                           | mmol/l | 0.037 [0.023–0.052]    | 113 | 0.035 [0.021–0.05]     | 97 | 0.037 [0.023–0.06]     | 98 | 0.45       | 0.78  | 0.81    | 0.42       |
| <b>Inflammation</b>                                                               |        |                        |     |                        |    |                        |    |            |       |         |            |
| Glycoprotein acetyls                                                              | mmol/l | 0.5 [0.45–0.58]        | 113 | 0.47 [0.44–0.55]       | 97 | 0.5 [0.46–0.55]        | 98 | 0.17       | 0.2   | 0.84    | 0.31       |

Overall p-value is calculated using the Kruskal-Wallis test, and for between group comparisons using the Dwass-Steel test. IQR: interquartile range. \* p < 0.01, \*\* p < 0.001, \*\*\* p < 0.0001
